# Supplementary material for: The burden of low back pain and its association with socio-demographic variables in the Middle East and North Africa region, 1990–2019
Source: PubMed Central journal article supplement (PMC9869505; doi:10.1186/s12891-023-06178-3), 2023-01-23
Supplement: 12891_2023_6178_MOESM7_ESM.pdf [file 12891_2023_6178_MOESM7_ESM.pdf]

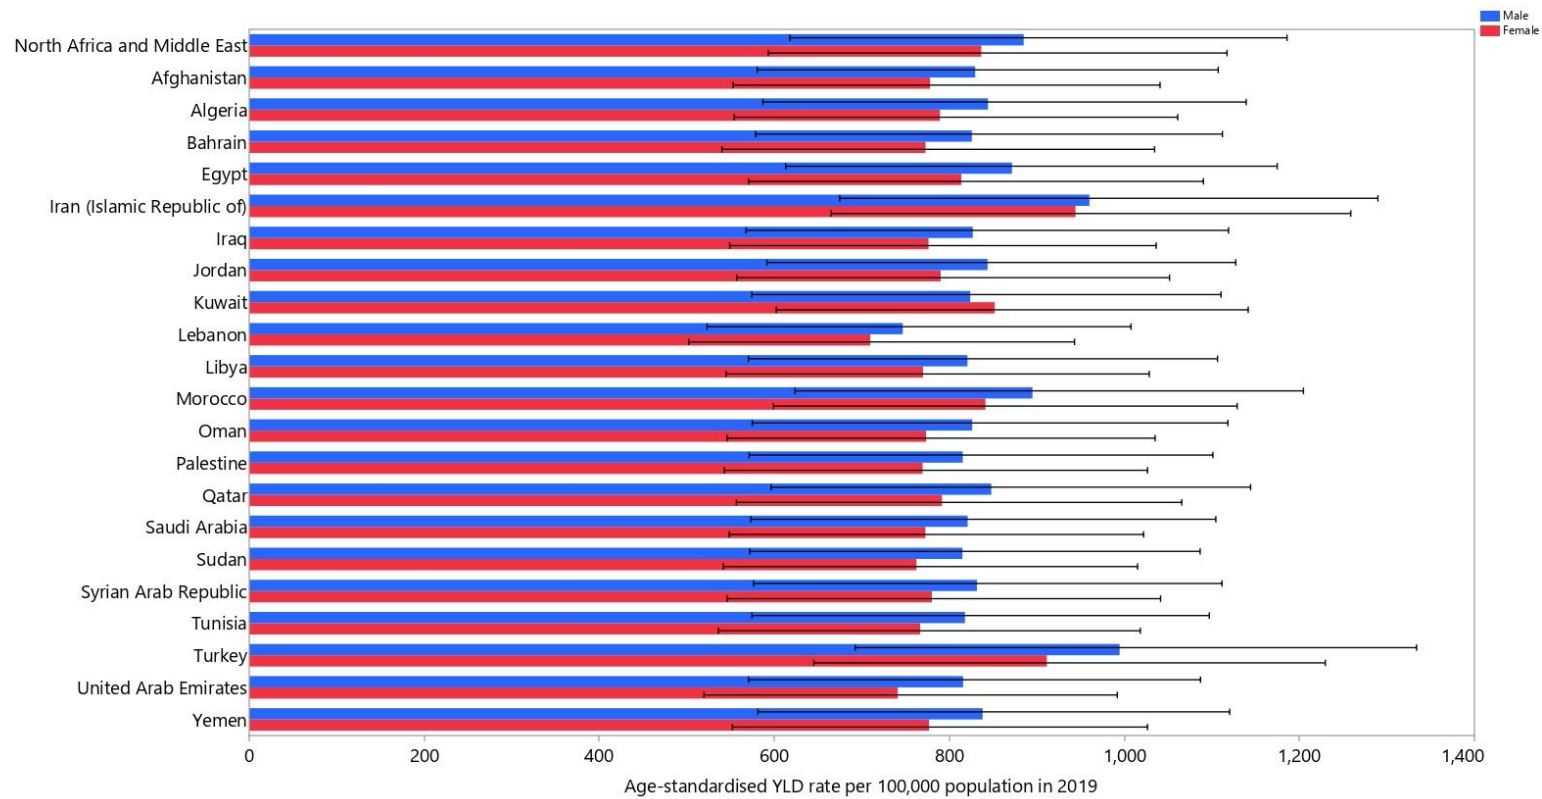

**Figure S2:** Age-standardised YLDs rate of low back pain (per 100,000 population) in the Middle East and North Africa region in 2019, by sex and country. YLD= years lived with disability. (Generated from data available from <http://ghdx.healthdata.org/gbd-results-tool>).
